# Supplementary material for: Expanding the Chemical Space of Arsenicin A-C Related Polyarsenicals and Evaluation of Some Analogs as Inhibitors of Glioblastoma Stem Cell Growth
Source: MDPI journal article supplement (doi:10.3390/md21030186), 2023-03-17
Supplement: s1 [file s1]

## Supplementary Materials

### Expanding the Chemical Space of Arsenicin A-C Related Polyarsenicals and Evaluation of Some Analogs as Inhibitors of Glioblastoma Stem Cell Growth

| Contents                                                                                                                                                                                                                                                                                                                                                                                                                                                                                                                                                                                                                                                                                 | Page(s): |
|------------------------------------------------------------------------------------------------------------------------------------------------------------------------------------------------------------------------------------------------------------------------------------------------------------------------------------------------------------------------------------------------------------------------------------------------------------------------------------------------------------------------------------------------------------------------------------------------------------------------------------------------------------------------------------------|----------|
| <b>Table S1.</b> Relevant experimental IR data and calculated frequencies from density functional theory (DFT)-vibrational analysis using the B1B95/6-311+G(3df,2pd) basis set for compounds 8 and 9.                                                                                                                                                                                                                                                                                                                                                                                                                                                                                    | S2       |
| <b>Figure S1.</b> <sup>1</sup> H- and <sup>13</sup> C-NMR spectra of synthetic mixture containing the sulfur nor-adamantane 10-12.                                                                                                                                                                                                                                                                                                                                                                                                                                                                                                                                                       | S3       |
| <b>Figure S2.</b> EI-MS spectrum of arsenicin D ( <b>13</b> ) present in the HPLC fraction by purification of the polyarsenical mixture from workup of the sponge <i>E. bargibanti</i> extract.                                                                                                                                                                                                                                                                                                                                                                                                                                                                                          | S4       |
| <b>Figure S3.</b> <sup>1</sup> H-NMR spectrum of the natural polyarsenicals mixture from workup of the sponge <i>E. bargibanti</i> extract; signals of arsenicin D are highlighted in yellow.                                                                                                                                                                                                                                                                                                                                                                                                                                                                                            | S4       |
| <b>Table S2.</b> Energies calculated for the structures of arsenicin A-D ( <b>1-3</b> and <b>13</b> ) and relative stability of the corresponding structures after O/S replacement by DFT calculation <i>in vacuo</i> at B1B95/6-311+G(3df,2pd) level of theory. The results were obtained by applying the following equations:<br>A) $\Delta E =  E(\text{Arsenicin X}) - n E(\text{S atoms}) + m E(\text{O atoms}) - E(\text{arsenicin A}) $<br>B) $\Delta E =  E(\text{Arsenicin Y}) - m E(\text{O atoms}) + n E(\text{S atoms}) - E(\text{arsenicin B/C/D}) $<br>where X and Y are for B, C or D, n = number of substituted sulfur atoms and m = number of substituted oxygen atoms. | S5       |
| <b>Table S3.</b> Selectivity Index (SI) values of alkyl polyarsenicals 7-9 and ATO, given by the ratio between the GI <sub>50</sub> values of non-tumor cell lines and GSC lines, respectively.                                                                                                                                                                                                                                                                                                                                                                                                                                                                                          | S6       |
| <b>Figure S4.</b> Western blot for p53, p21, and actin in COMI cells treated with 100 μM of camptothecin (CTH) for 16 hours.                                                                                                                                                                                                                                                                                                                                                                                                                                                                                                                                                             | S6       |
| <b>Table S4.</b> GI <sub>50</sub> values in μM of alkyl polyarsenicals 7-9 and ATO on COMI cells grown either under normoxic conditions (normoxia), under hypoxic conditions for the duration of the treatment (hypoxia 48 h), or under hypoxic conditions for one week prior to drug treatment (hypoxia 1 week).                                                                                                                                                                                                                                                                                                                                                                        | S6       |
| <b>Figures S5-S11.</b> Predicted physical-chemical properties and bioavailability radar for compounds 1 and 7-12 evaluated by Swiss-ADME software ( <a href="http://www.swissadme.ch/">http://www.swissadme.ch/</a> accessed on 9 January 2023).                                                                                                                                                                                                                                                                                                                                                                                                                                         | S7-S10   |
| <b>Figure S12.</b> WLOGP-versus-TPSA in Brain Or IntestinaL EstimateD permeation method (BOILED)-Egg visualization for alkyl adamantane 7-9 and dimethyl As-S compounds 10-12 in comparison with arsenicin A ( <b>1</b> ) evaluated by using Swiss-ADME software ( <a href="http://www.swissadme.ch/">http://www.swissadme.ch/</a> accessed on 9 January 2023).                                                                                                                                                                                                                                                                                                                          | S10      |
| <b>Table S5.</b> Polar surface area (PSA), lipophilicity (LogP) and blood-brain barrier (BBB) parameters evaluated by using the indicated chemoinformatics software (Swiss-ADME: <a href="http://www.swissadme.ch/">http://www.swissadme.ch/</a> accessed on 9 January 2023; Molsft L.L.C.: <a href="https://www.molsoft.com/">https://www.molsoft.com/</a> accessed on 2 March 2023; Molinspiration: <a href="https://www.molinspiration.com/">https://www.molinspiration.com/</a> accessed on 2 March 2023).                                                                                                                                                                           | S11      |
| <b>Figure S13.</b> <sup>1</sup> H- and <sup>13</sup> C-NMR spectra of compound 8.                                                                                                                                                                                                                                                                                                                                                                                                                                                                                                                                                                                                        | S12      |
| <b>Figure S14.</b> <sup>1</sup> H- and <sup>13</sup> C-NMR spectra of compound 9.                                                                                                                                                                                                                                                                                                                                                                                                                                                                                                                                                                                                        | S13      |
| <b>Table S6.</b> Seeding numbers (expressed in cells/well) used for testing the alkyl polyarsenicals 7-9 and ATO in 384-well plates.                                                                                                                                                                                                                                                                                                                                                                                                                                                                                                                                                     | S14      |

**Table S1.** Relevant experimental IR data and calculated frequencies from density functional theory (DFT)-vibrational analysis using the B1B95/6-311+G(3df,2pd) basis set for compounds **8** and **9**.

| IR frequency (cm <sup>-1</sup> ) |              | Relative Intensity | Assignment                            |
|----------------------------------|--------------|--------------------|---------------------------------------|
| Calculated                       | Experimental |                    |                                       |
| <i>Compound 8</i>                |              |                    |                                       |
| 463                              | 456          | strong             | As-O-As bending                       |
| 727                              | 723          | strong             | As-C-As stretching                    |
| 797                              | 795          | very strong        | As-O stretching                       |
| 1067                             | 1043         | medium             | CH twisting                           |
| 1326                             | 1375         | weak               | CH <sub>3</sub> symmetric bending     |
| 1413                             | 1451         | medium             | CH <sub>3</sub> twisting              |
| 2832                             | 2837         | weak               | symmetric CH <sub>2</sub> stretching  |
| 2867                             | 2843         | weak               | symmetric CH <sub>3</sub> stretching  |
| 2933                             | 2923         | weak               | asymmetric CH <sub>3</sub> stretching |
| 2941                             | 2954         | medium             | asymmetric CH <sub>3</sub> stretching |
| <i>Compound 9</i>                |              |                    |                                       |
| 458                              | 443          | strong             | As-O-As bending                       |
| 464                              | 465          | strong             | As-O-As bending                       |
| 731                              | 717          | strong             | As-C-As stretching                    |
| 796                              | 789          | very strong        | As-O stretching                       |
| 1072                             | 1063         | medium             | CH twisting                           |
| 1418                             | 1461         | medium             | CH <sub>3</sub> twisting              |
| 2820                             | 2827         | medium             | symmetric CH <sub>2</sub> stretching  |
| 2857                             | 2852         | medium             | symmetric CH <sub>2</sub> stretching  |
| 2866                             | 2870         | medium             | symmetric CH <sub>3</sub> stretching  |
| 2894                             | 2916         | medium             | asymmetric CH <sub>2</sub> stretching |
| 2940                             | 2953         | medium             | asymmetric CH <sub>3</sub> stretching |

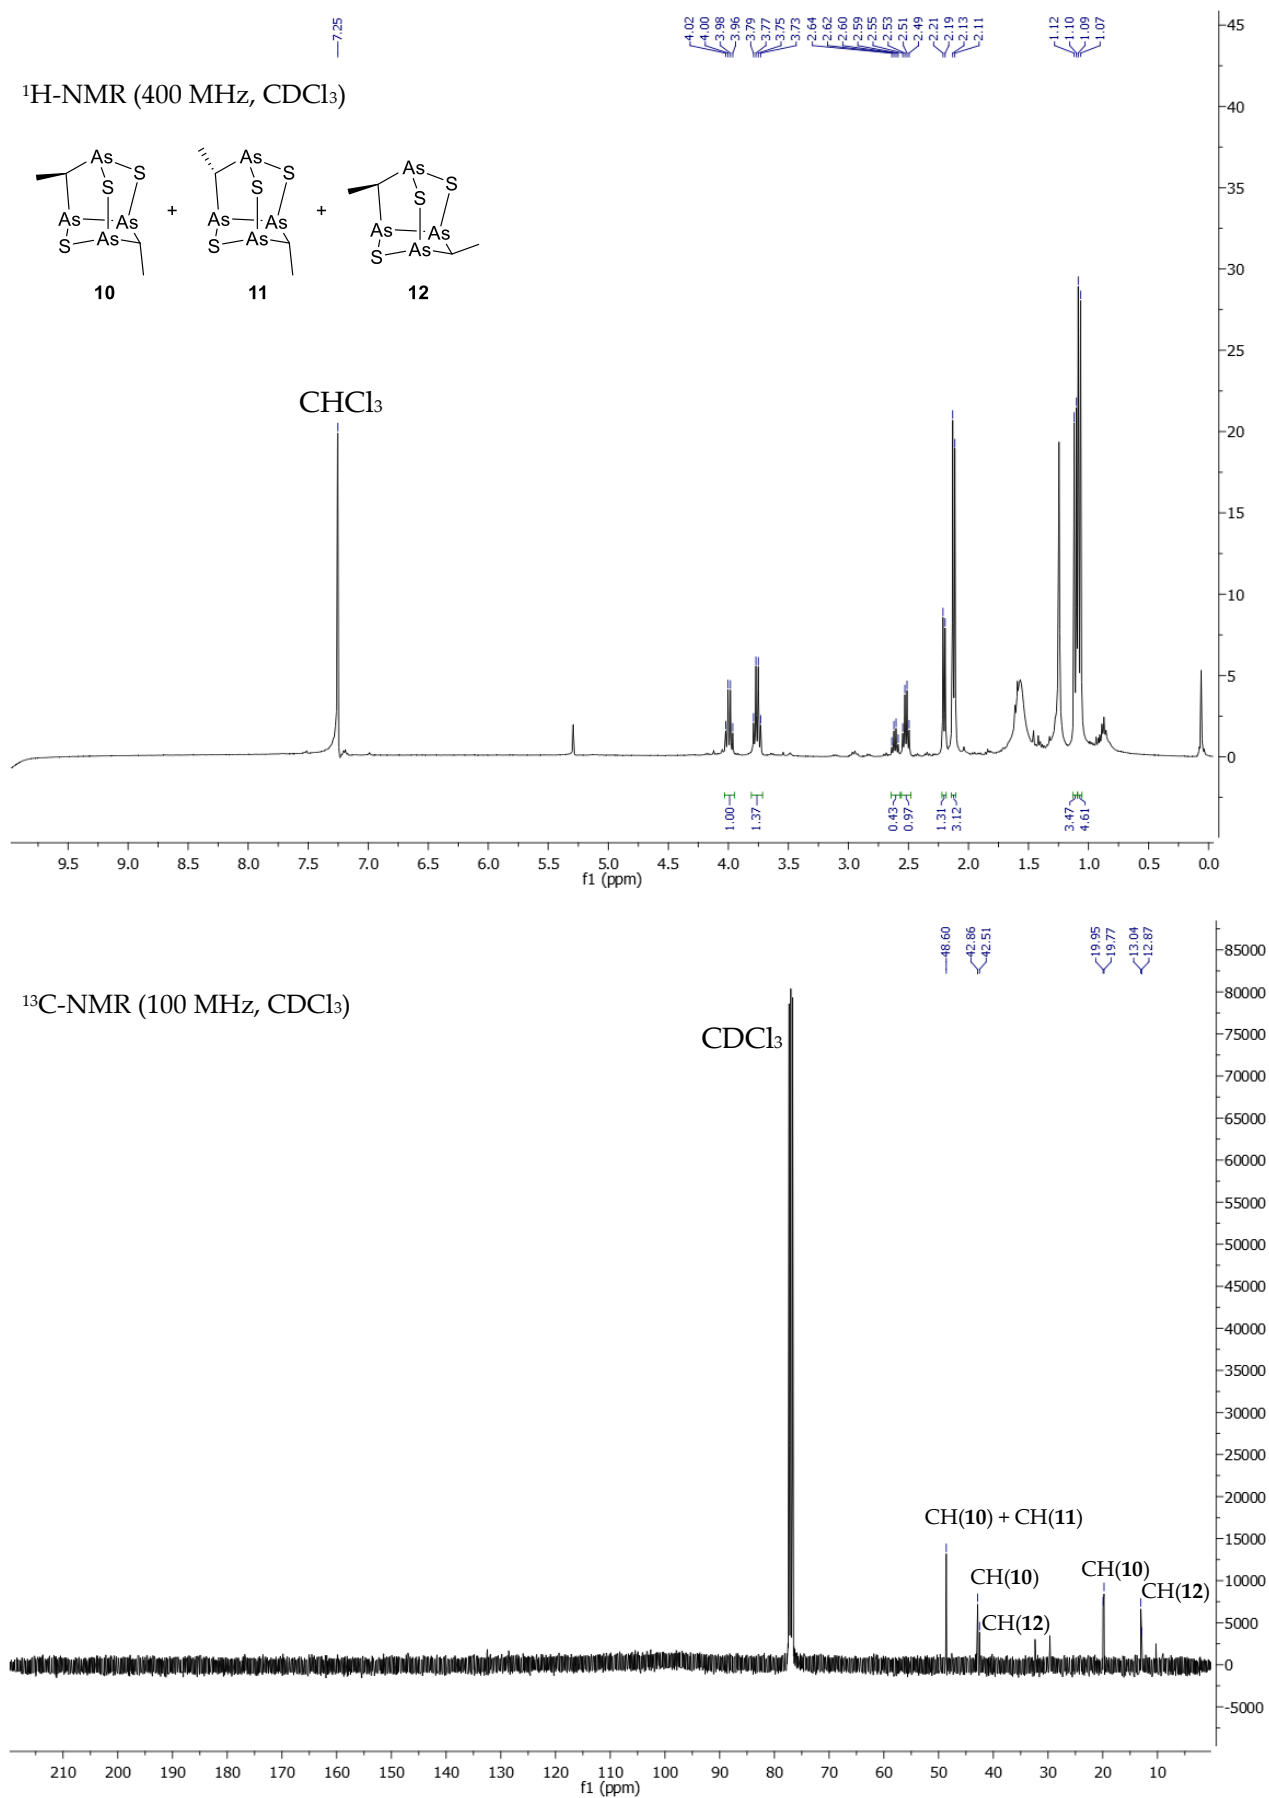

**Figure S1.** <sup>1</sup>H- and <sup>13</sup>C-NMR spectra of sulfur derivatives mixture.

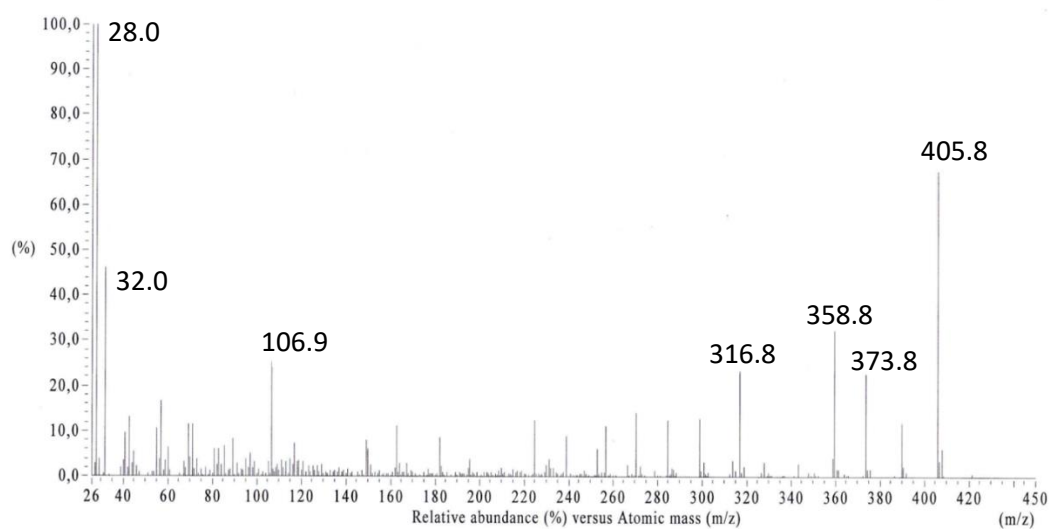

**Figure S2.** EI-MS spectrum of arsenicin D (**13**) present in the HPLC fraction by purification of the polyarsenical mixture from workup of the sponge *E. bargibanti* extract.

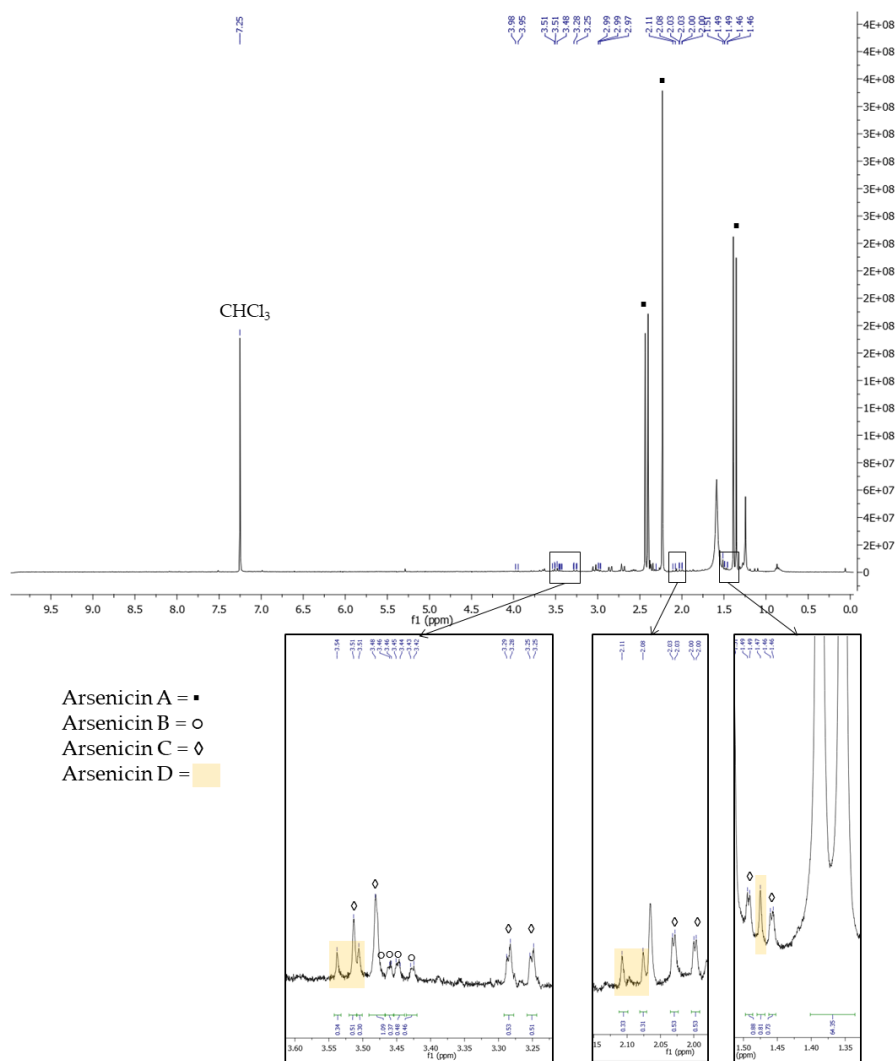

**Figure S3.** <sup>1</sup>H-NMR spectrum of the natural polyarsenicals mixture from workup of the sponge *E. bargibanti* extract; signals of arsenicin D are highlighted in yellow.

**Table S2.** Energies calculated for the structures of arsenicin A-D (**1-3** and **13**) and relative stability of the corresponding structures after O/S replacement by DFT calculation *in vacuo* at B1B95/6-311+G(3df,2pd) level of theory. The results were obtained by applying the following equations:

$$\text{A) } \Delta E = |E(\text{Arsenicin X}) - n E(\text{S atoms}) + m E(\text{O atoms}) - E(\text{arsenicin A})|$$

$$\text{B) } \Delta E = |E(\text{Arsenicin Y}) - m E(\text{O atoms}) + n E(\text{S atoms}) - E(\text{arsenicin B/C/D})|$$

where X and Y are for B, C or D, n = number of substituted sulfur atoms and m = number of substituted oxygen atoms.

|                                                                                             | Equation | Energy (a.u.) | $\Delta E$ (a.u.) | $\Delta E$ (kcal/mol) |
|---------------------------------------------------------------------------------------------|----------|---------------|-------------------|-----------------------|
| Arsenicin A ( <b>1</b> , C <sub>3</sub> H <sub>6</sub> As <sub>4</sub> O <sub>3</sub> )     | A        | -9288.336433  | 0.0               | -                     |
| Arsenicin B ( <b>2</b> , C <sub>3</sub> H <sub>6</sub> As <sub>4</sub> S <sub>2</sub> )     | A        | -9859.187098  | 0.451145          | 285.96                |
| Arsenicin C ( <b>3</b> , C <sub>3</sub> H <sub>6</sub> As <sub>4</sub> OS)                  | A        | -9536.145045  | 0.35991           | 227.11                |
| Arsenicin D ( <b>13</b> , C <sub>3</sub> H <sub>6</sub> As <sub>4</sub> S <sub>2</sub> )    | A        | -9859.188891  | 0.449352          | 285.27                |
| Arsenicin A ( <b>1</b> )                                                                    |          | -9288.336433  | -                 | -                     |
| 3S-Arsenicin A (C <sub>3</sub> H <sub>6</sub> As <sub>4</sub> S <sub>3</sub> )              | A        | -10257.450842 | 0.285455          | 179.13                |
| Arsenicin B ( <b>2</b> )                                                                    |          | -9859.187098  |                   |                       |
| 2O-Arsenicin B (C <sub>3</sub> H <sub>6</sub> As <sub>4</sub> O <sub>2</sub> ) <sup>a</sup> | B        | -9213.103230  | 0.182708          | 114.70                |
| Arsenicin C ( <b>3</b> )                                                                    |          | -9536.145045  |                   |                       |
| 2O-Arsenicin C (C <sub>3</sub> H <sub>6</sub> As <sub>4</sub> O <sub>2</sub> ) <sup>a</sup> | B        | -9213.103230  | 0.091473          | 57.40                 |
| Arsenicin D ( <b>13</b> )                                                                   |          | -9859.188891  |                   |                       |
| 2O-Arsenicin D(C <sub>3</sub> H <sub>6</sub> As <sub>4</sub> O <sub>2</sub> )               | B        | -9213.095435  | 0.17312           | 108.63                |
| Oxygen atom                                                                                 |          | -74.964766    | -                 | -                     |
| Sulfur atom                                                                                 |          | -398.098054   | -                 | -                     |

<sup>a</sup> the same structure

**Table S3.** Selectivity Index (SI) values of alkyl polyarsenicals **7-9** and ATO, given by the ratio between the GI<sub>50</sub> values of non-tumor cell lines and GSC lines, respectively.

|         | ATO     |        |            |                 | 7       |        |            |      | 8       |        |            |       | 9       |        |            |       |
|---------|---------|--------|------------|-----------------|---------|--------|------------|------|---------|--------|------------|-------|---------|--------|------------|-------|
|         | ARPE-19 | MCF10A | hTERT-HPNE | Hs68            | ARPE-19 | MCF10A | hTERT-HPNE | Hs68 | ARPE-19 | MCF10A | hTERT-HPNE | Hs68  | ARPE-19 | MCF10A | hTERT-HPNE | Hs68  |
| COMI    | 3.1     | 1.6    | 3.1        | nd <sup>a</sup> | 14.6    | 16.9   | 20.8       | 51.9 | 17.2    | 17.8   | 29.6       | 124.0 | 13.5    | 13.3   | 43.8       | 107.3 |
| VIPI    | 0.7     | 0.3    | 0.7        | nd <sup>a</sup> | 1.8     | 2.1    | 2.6        | 6.5  | 3.9     | 4.0    | 6.7        | 28.2  | 3.0     | 2.9    | 9.7        | 23.8  |
| GB6     | 1.0     | 0.5    | 1.0        | nd <sup>a</sup> | 2.0     | 2.3    | 2.8        | 7.1  | 2.5     | 2.6    | 4.4        | 18.2  | 1.6     | 1.6    | 5.1        | 12.6  |
| GB7     | 2.1     | 1.1    | 2.1        | nd <sup>a</sup> | 24.3    | 28.2   | 34.7       | 86.4 | 17.2    | 17.8   | 29.6       | 124.0 | 10.8    | 10.6   | 35.0       | 85.8  |
| G144    | 1.3     | 0.7    | 1.3        | nd <sup>a</sup> | 6.6     | 7.7    | 9.5        | 23.6 | 9.6     | 9.9    | 16.4       | 68.9  | 6.8     | 6.6    | 21.9       | 53.6  |
| G166    | 0.7     | 0.4    | 0.7        | nd <sup>a</sup> | 1.5     | 1.7    | 2.1        | 5.3  | 2.8     | 2.9    | 4.8        | 20.0  | 2.3     | 2.2    | 7.3        | 17.9  |
| GB8     | 0.8     | 0.4    | 0.8        | nd <sup>a</sup> | 1.6     | 1.9    | 2.3        | 5.8  | 2.6     | 2.7    | 4.5        | 18.8  | 1.9     | 1.9    | 6.3        | 15.3  |
| GSC#1   | 1.4     | 0.7    | 1.4        | nd <sup>a</sup> | 3.3     | 3.8    | 4.7        | 11.8 | 4.5     | 4.7    | 7.8        | 32.6  | 3.0     | 2.9    | 9.7        | 23.8  |
| GSC#151 | 0.7     | 0.4    | 0.7        | nd <sup>a</sup> | 3.5     | 4.1    | 5.0        | 12.5 | 7.2     | 7.4    | 12.3       | 51.7  | 3.2     | 3.1    | 10.3       | 25.2  |

<sup>a</sup> nd: not determined. SI was not calculated since the GI<sub>50</sub> value of ATO on Hs68 was greater than the highest concentration tested (>100  $\mu$ M).

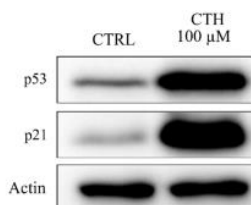

**Figure S4.** Western blot for p53, p21, and actin in COMI cells treated with 100  $\mu$ M of camptothecin (CTH) for 16 hours.

**Table S4.** GI<sub>50</sub> values<sup>a</sup> in  $\mu$ M of alkyl polyarsenicals **7-9** and ATO on COMI cells grown either under normoxic conditions (normoxia), under hypoxic conditions for the duration of the treatment (hypoxia 48 h), or under hypoxic conditions for one week prior to drug treatment (hypoxia 1 week).

|                | ATO             | 7               | 8               | 9                 |
|----------------|-----------------|-----------------|-----------------|-------------------|
| Normoxia       | 0.96 $\pm$ 0.06 | 0.15 $\pm$ 0.02 | 0.05 $\pm$ 0.07 | 0.040 $\pm$ 0.004 |
| Hypoxia 48 h   | 0.98 $\pm$ 0.06 | 0.15 $\pm$ 0.05 | 0.07 $\pm$ 0.02 | 0.06 $\pm$ 0.02   |
| Hypoxia 1 week | 1.04 $\pm$ 0.07 | 0.14 $\pm$ 0.07 | 0.08 $\pm$ 0.04 | 0.06 $\pm$ 0.02   |

<sup>a</sup> GI<sub>50</sub> values were calculated upon treating COMI cells with different compound concentrations for 48 h. The GI<sub>50</sub> values were calculated from n = 6 biological replicates, n = 3 technical replicates each, mean  $\pm$  SEM.

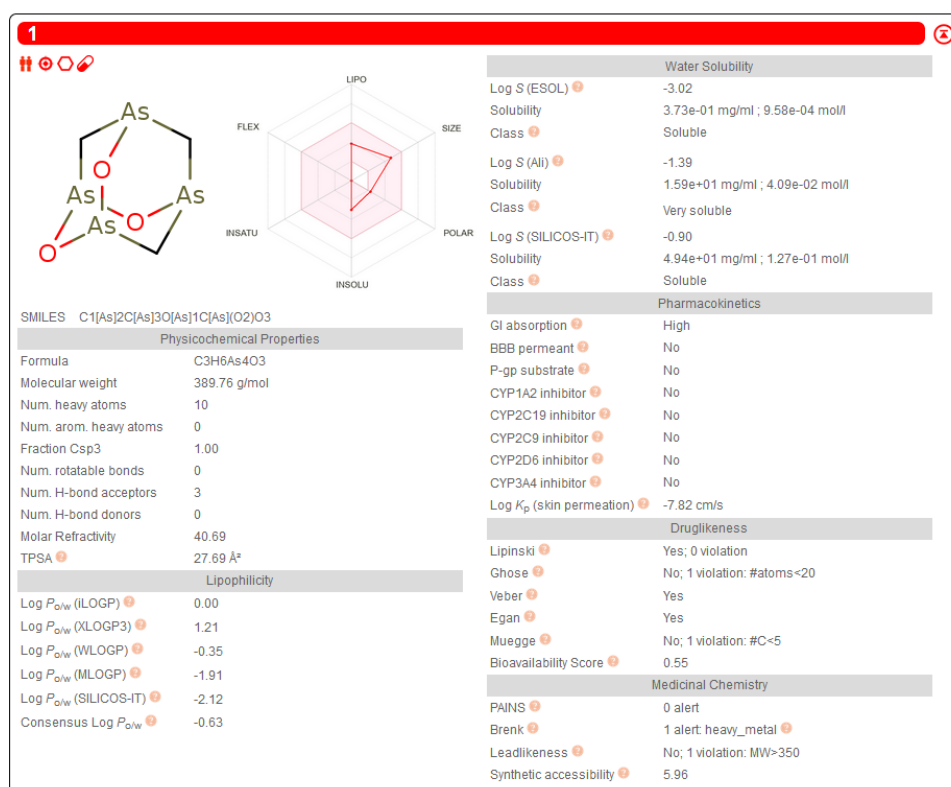

**Figure S5.** Predicted physical-chemical properties and bioavailability radar for arsenicin A (1) evaluated by using Swiss-ADME software (<http://www.swissadme.ch/> accessed on 9 January 2023).

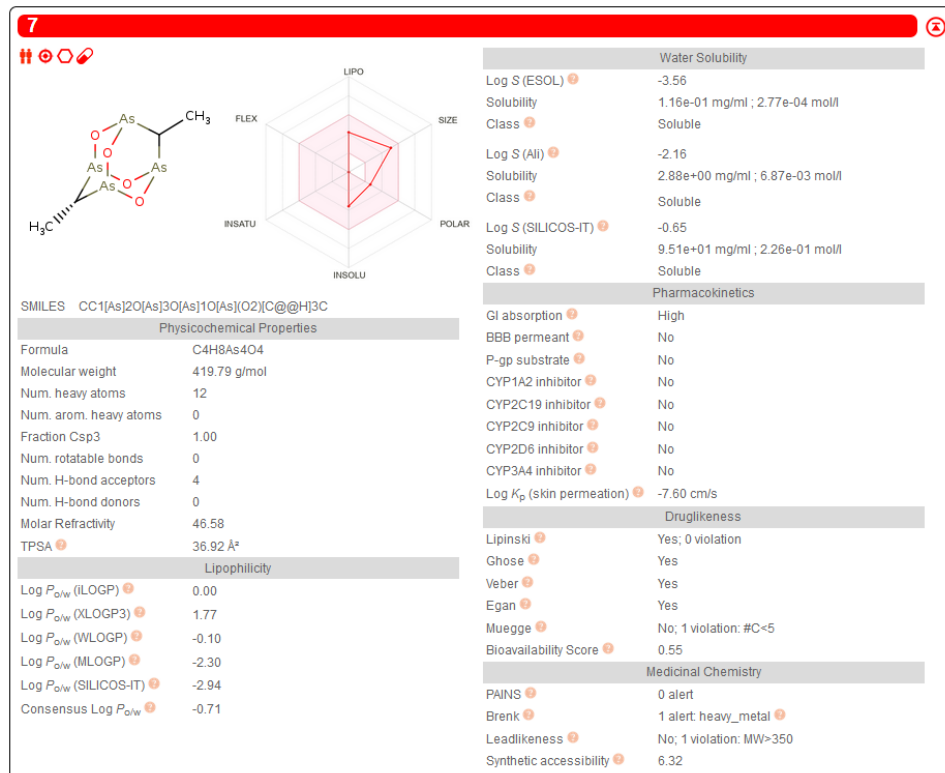

**Figure S6.** Predicted physical-chemical properties and bioavailability radar for compounds 7 evaluated by using Swiss-ADME software (<http://www.swissadme.ch/> accessed on 9 January 2023).

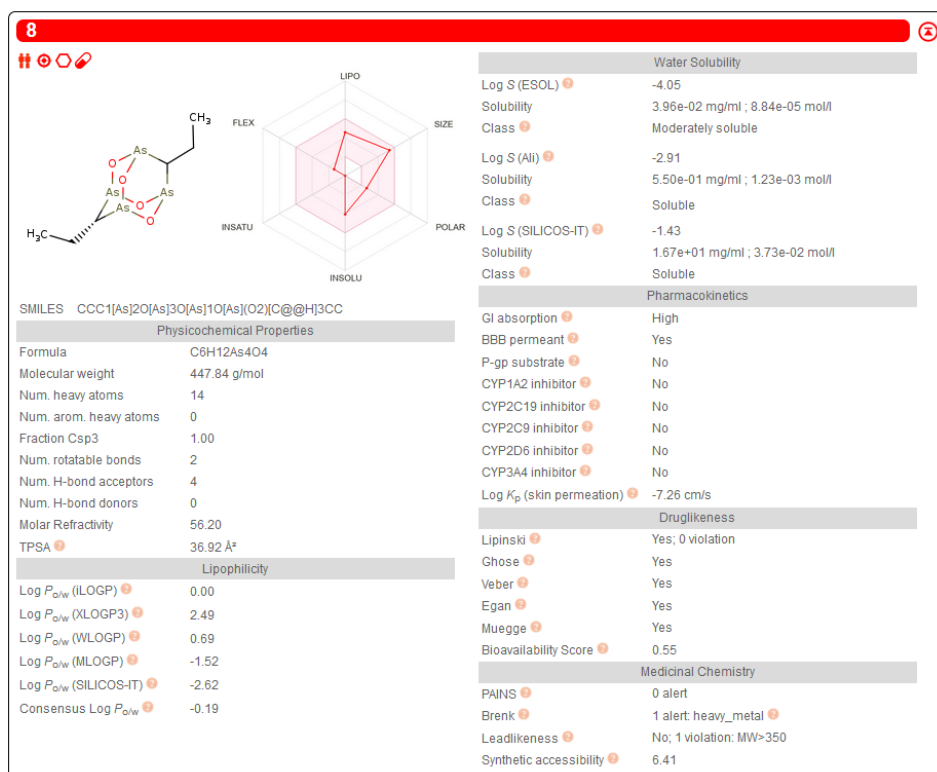

**Figure S7.** Predicted physical-chemical properties and bioavailability radar for compounds **8** evaluated by using Swiss-ADME software (<http://www.swissadme.ch/> accessed on 9 January 2023).

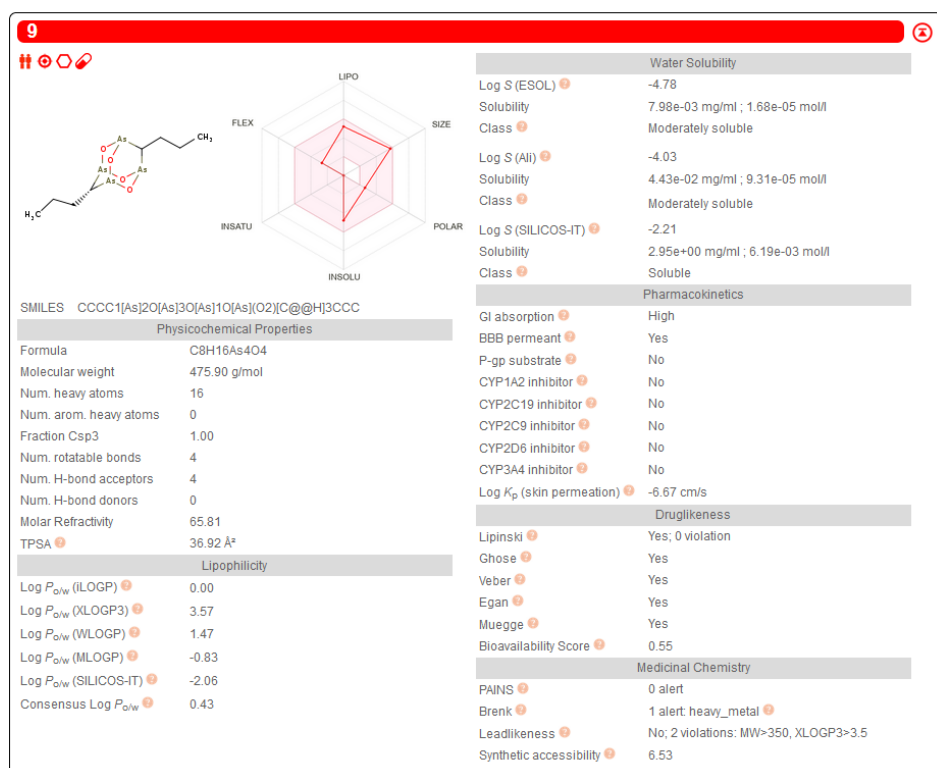

**Figure S8.** Predicted physical-chemical properties and bioavailability radar for compounds **9** evaluated by using Swiss-ADME software (<http://www.swissadme.ch/> accessed on 9 January 2023).



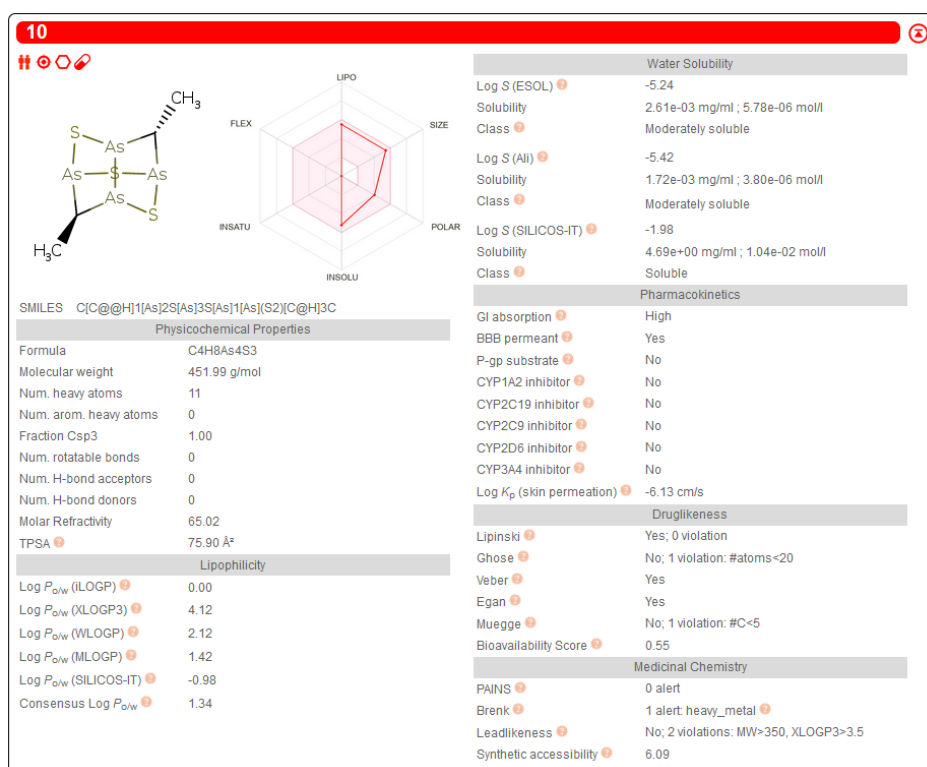

**Figure S9.** Predicted physical-chemical properties and bioavailability radar for compounds **10** evaluated by using Swiss-ADME software (<http://www.swissadme.ch/> accessed on 9 January 2023).

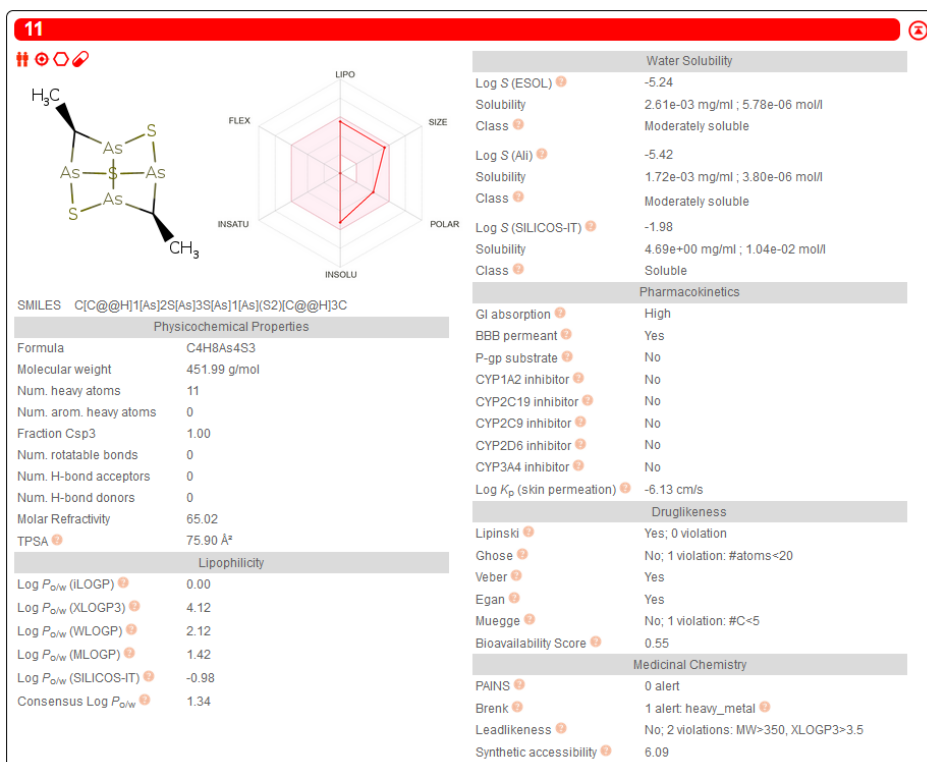

**Figure S10.** Predicted physical-chemical properties and bioavailability radar for compounds **11** evaluated by using Swiss-ADME software (<http://www.swissadme.ch/> accessed on 9 January 2023).

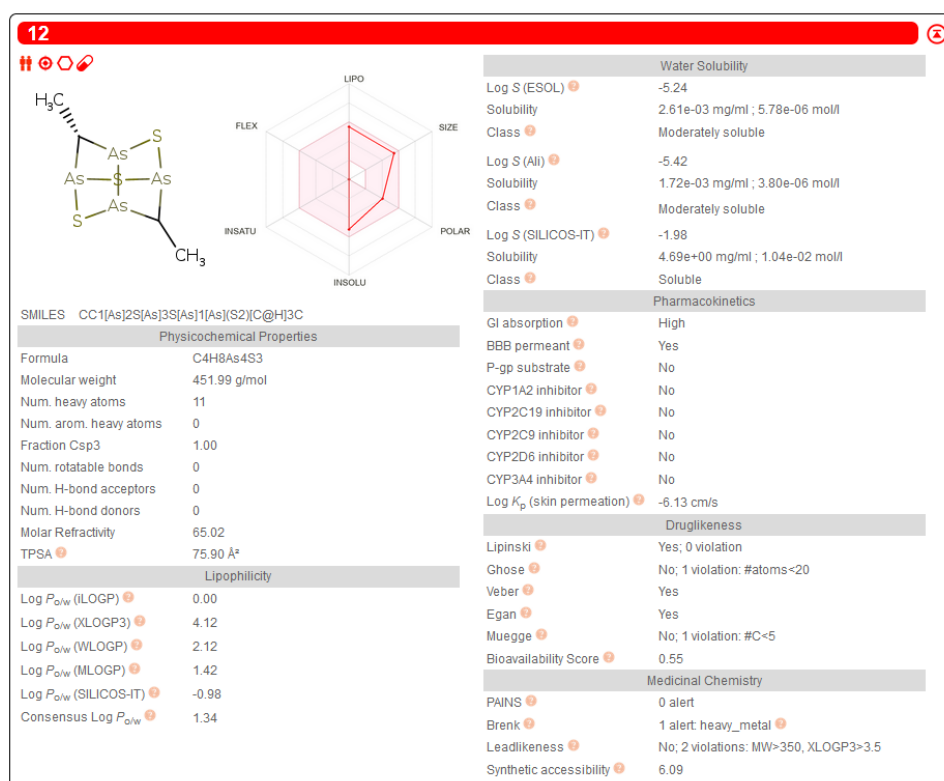

**Figure S11.** Predicted physical-chemical properties and bioavailability radar for compounds **12** evaluated by using Swiss-ADME software (<http://www.swissadme.ch/> accessed on 9 January 2023).

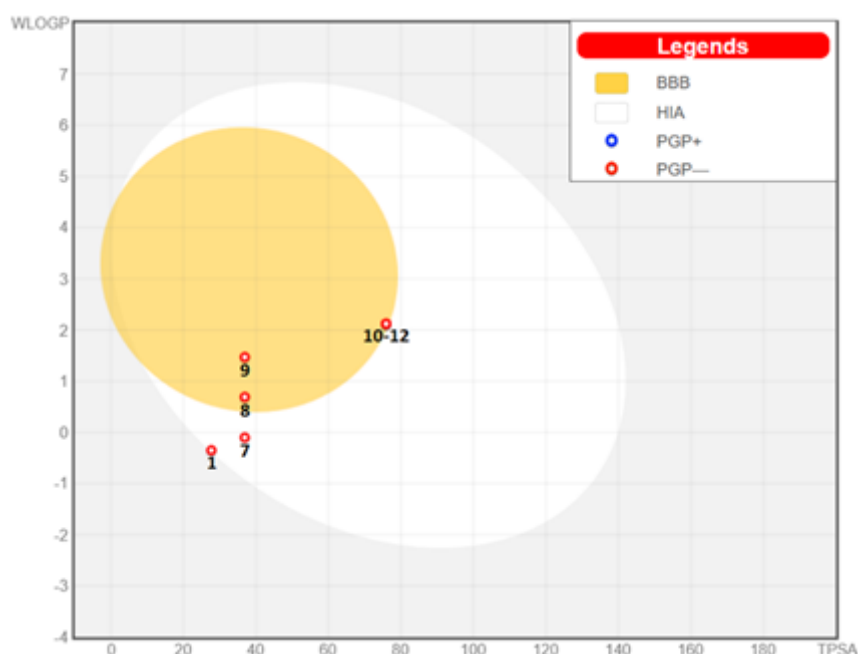

**Figure S12.** WLOGP-versus-TPSA in Brain Or IntestinaL EstimateD permeation method (BOILED)-Egg visualization for alkyl adamantane **7-9** and dimethyl As-S compounds **10-12** in comparison with arsenicin A (**1**) evaluated by using Swiss-ADME software (<http://www.swissadme.ch/> accessed on 9 January 2023).

**Table S5.** Polar surface area (PSA), lipophilicity (LogP) and blood-brain barrier (BBB) parameters evaluated by using the indicated chemoinformatics software (Swiss-ADME: <http://www.swissadme.ch/> accessed on 9 January 2023; Molsft L.L.C.: <https://www.molsoft.com/> accessed on 2 March 2023; Molinspiration: <https://www.molinspiration.com/> accessed on 2 March 2023).

| Web tool       | Properties               | Arsenicin A | Compound 7 | Compound 8 | Compound 9 |
|----------------|--------------------------|-------------|------------|------------|------------|
| SwissADME      | TPSA (Å <sup>2</sup> )   | 27.69       | 36.92      | 36.92      | 36.92      |
|                | WLogP                    | -0.35       | -0.10      | 0.69       | 1.47       |
|                | Consensus Log P          | -0.63       | -0.71      | -0.19      | 0.43       |
|                | BBB permeant             | No          | No         | Yes        | Yes        |
| Molinspiration | TPSA (Å <sup>2</sup> )   | 27.70       | 36.94      | 36.94      | 36.94      |
|                | miLog P                  | -3.03       | -2.36      | -1.35      | -0.23      |
|                | BBB                      | -           | -          | -          | -          |
| Molsoft L.L.C. | MolPSA (Å <sup>2</sup> ) | 44.01       | 42.38      | 42.38      | 42.38      |
|                | MolLog P                 | -0.34       | 0.06       | 1.03       | 1.98       |
|                | BBB score <sup>a</sup>   | 3.77        | 4.03       | 4.12       | 4.19       |

<sup>a</sup> BBB Score: 6-High, 0-Low

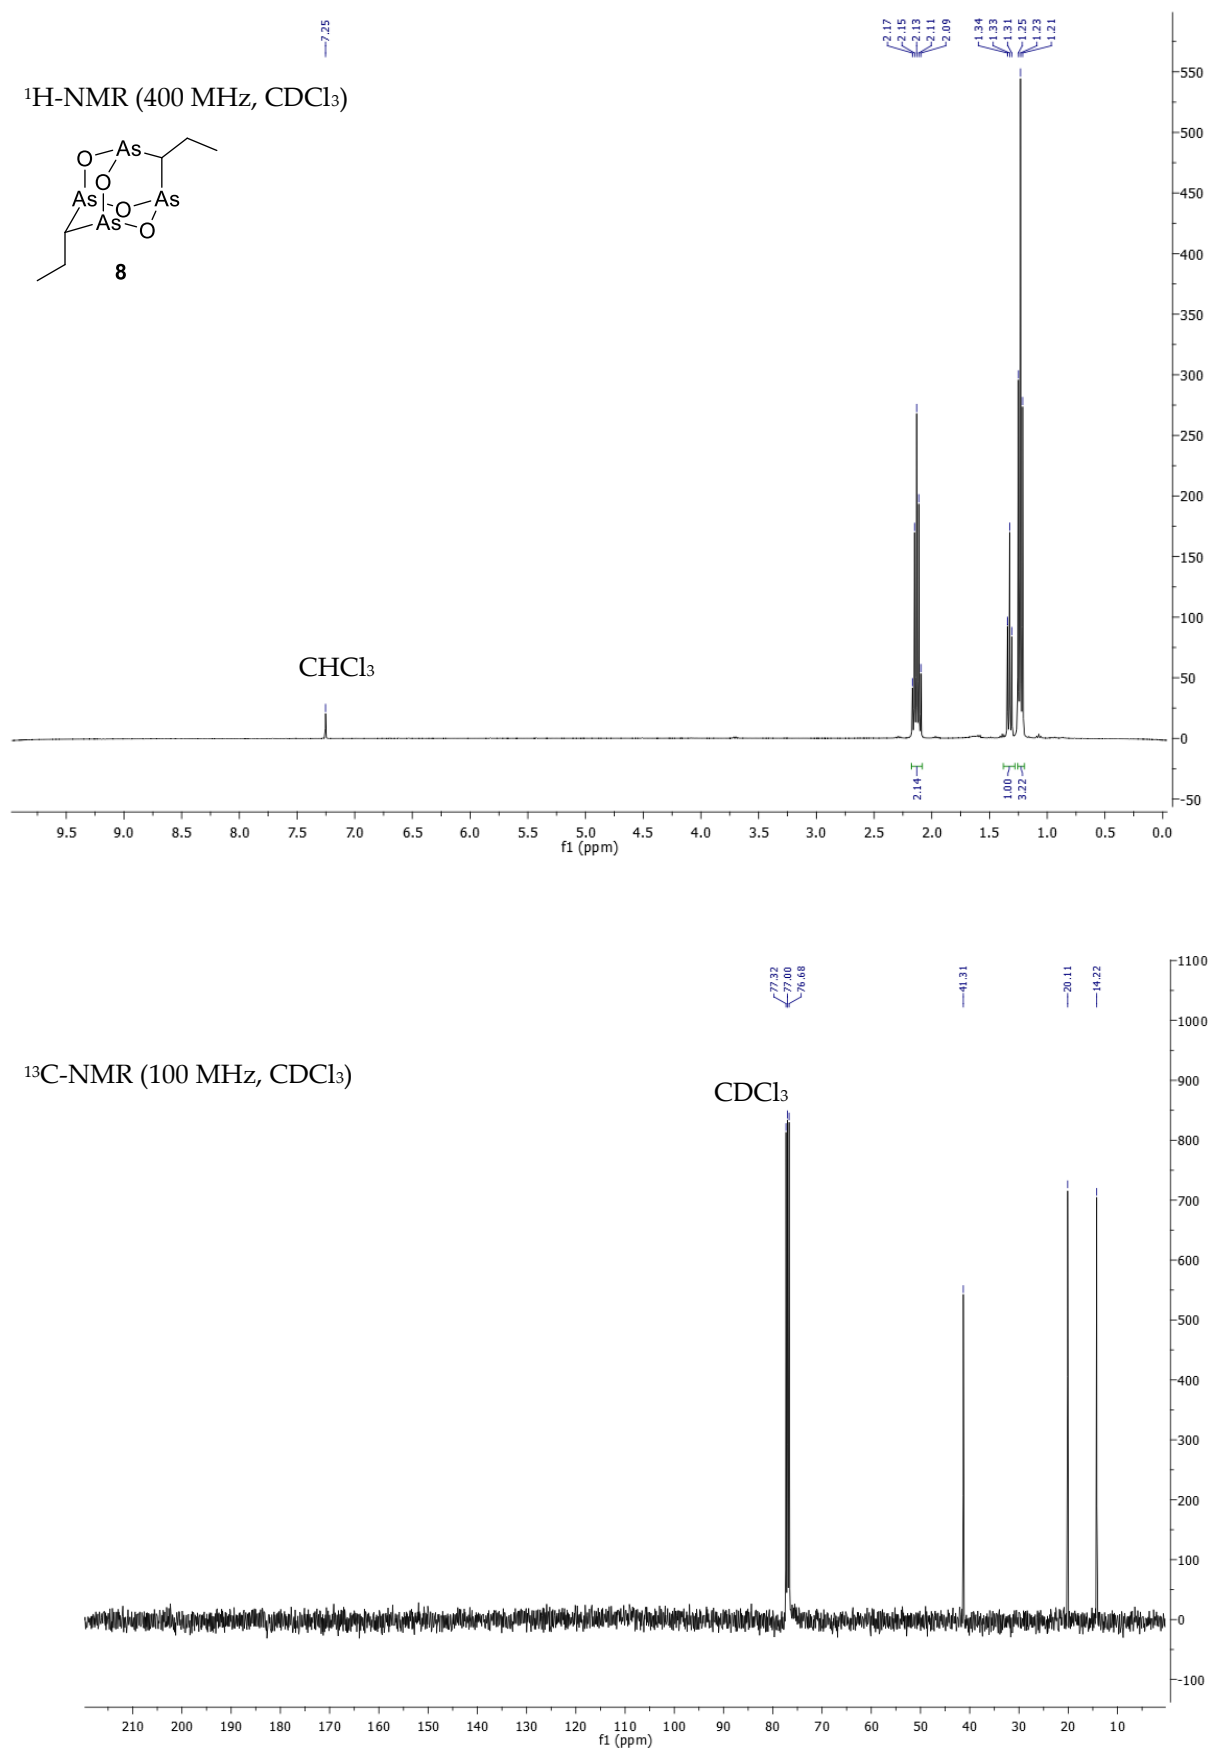

Figure S13. <sup>1</sup>H- and <sup>13</sup>C-NMR spectra of compound 8.

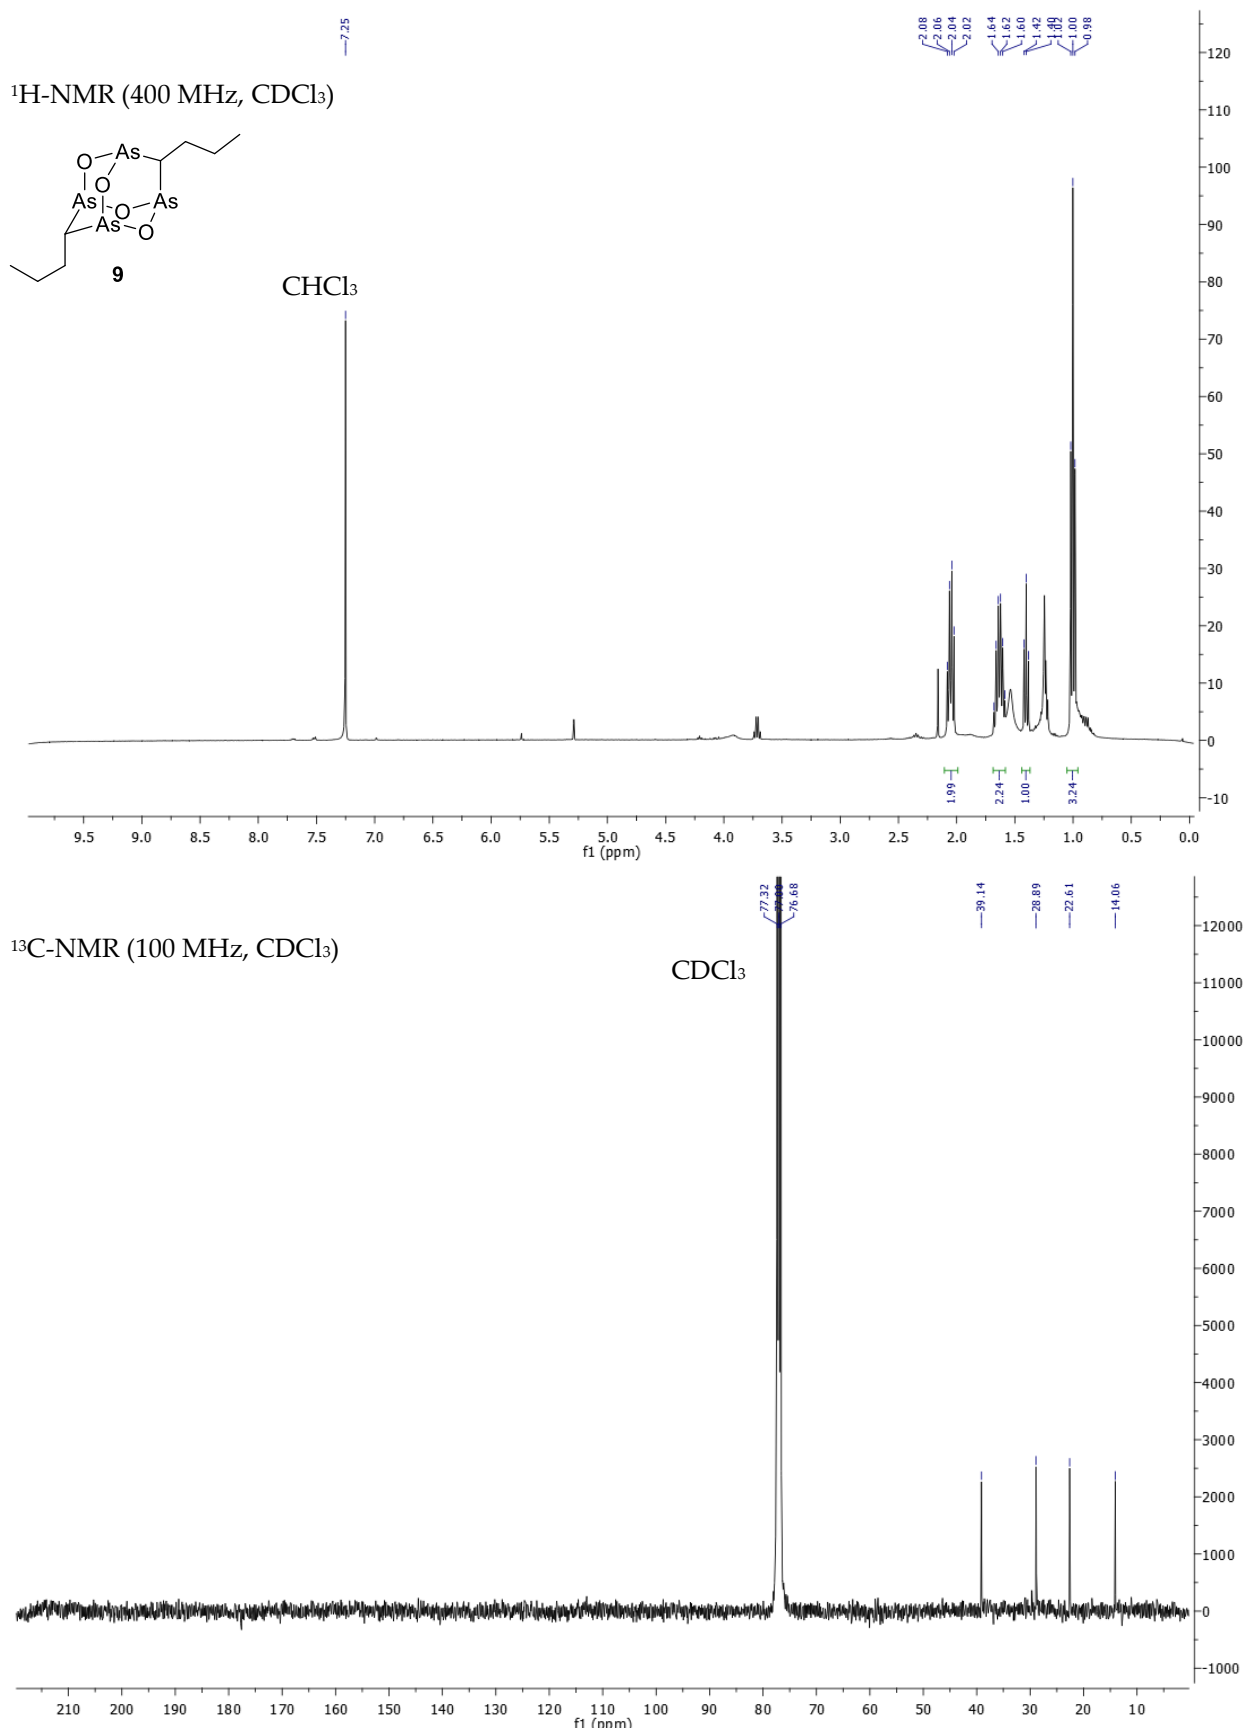

Figure S14. <sup>1</sup>H- and <sup>13</sup>C-NMR spectra of compound **9**.

**Table S6.** Seeding numbers (expressed in cells/well) used for testing the alkyl polyarsenicals 7-9 and ATO in 384-well plates.

| <b>Cell Line</b> | <b>Seeding Number<br/>(cells/well)</b> |
|------------------|----------------------------------------|
| COMI             | 1000                                   |
| VIPI             | 1000                                   |
| GB6              | 3000                                   |
| GB7              | 3000                                   |
| G144             | 2000                                   |
| G166             | 1000                                   |
| GB8              | 1500                                   |
| GSC#1            | 1500                                   |
| GSC#151          | 1500                                   |
| ARPE-19          | 1500                                   |
| MCF10A           | 1000                                   |
| hTERT-HPNE       | 1500                                   |
| Hs68             | 1500                                   |
